# Supplementary material for: PET/CT scan and biopsy-driven approach for safe anti-PD-1 therapy discontinuation in patients with advanced melanoma
Source: PubMed Central journal article supplement — J Immunother Cancer. 2021 Oct 1;9(10):e002955. doi: 10.1136/jitc-2021-002955 (PMC8488718; doi:10.1136/jitc-2021-002955), 2021-10-01
Supplement: jitc-2021-002955supp001.pdf [file jitc-2021-002955supp001.pdf]

## Supplemental Table 1. All Patient characteristics

| Characteristics     | Total (n=122) | Monotherapy (n=46) | Combo (n=76) | Statistics (mono vs combo)   |
|---------------------|---------------|--------------------|--------------|------------------------------|
| Median age          | 64 years      | 69 years           | 59 years     | P < 0.001 (t-test; ANOVA)    |
| Male gender (%)     | 72 (59%)      | 32 (70%)           | 40 (53%)     | P=0.065 (pearson chi-square) |
| ECOG 0-1(%)         | 115 (94%)     | 42 (91%)           | 73 (96%)     | P=0.138 (pearson chi-square) |
| LDH elevated        | 50 (41%)      | 19 (41%)           | 31 (41%)     | P=0.997 (pearson chi-square) |
| Primary tumor type  |               |                    |              |                              |
| Cutaneous           | 75 (62%)      | 27 (59%)           | 48 (63%)     | P=0.086 (pearson chi-square) |
| Acral               | 7 (6%)        | 2 (4%)             | 5 (7%)       |                              |
| Mucosal             | 13 (11%)      | 9 (20%)            | 4 (5%)       |                              |
| Unknown             | 27 (22%)      | 8 (17%)            | 19 (25%)     |                              |
| Disease stage at tx |               |                    |              |                              |
| III                 | 16 (13%)      | 10 (22%)           | 6 (8%)       | P=0.028 (pearson chi-square) |
| IV                  | 106 (87%)     | 36 (78%)           | 70 (92%)     |                              |
| M stage at tx       |               |                    |              |                              |
| M1a                 | 8 (7%)        | 3 (7%)             | 5 (7%)       | P=0.893 (pearson chi-square) |
| M1b                 | 23 (19%)      | 9 (20%)            | 14 (18%)     |                              |
| M1c                 | 37 (30%)      | 11 (24%)           | 26 (34%)     |                              |
| M1d                 | 38 (31%)      | 13 (28%)           | 25 (33%)     |                              |
| BRAF mut (%)        | 50 (41%)*     | 13 (28%)**         | 37 (49%***)  | P=0.037 (pearson chi-square) |
| Brain mets (%)      | 38 (31%)      | 13 (28%)           | 25 (33%)     | P=0.592 (pearson chi-square) |
| Prior systemic tx   |               |                    |              |                              |
| Ipilimumab          | 44 (36%)      | 22 (48%)           | 22 (29%)     | P=0.035 (pearson chi-square) |
| BRAFi/MEKi          | 20 (16%)      | 18 (39%)           | 2 (3%)       | P<0.001 (pearson chi-square) |
|                     | 15(12%)       | 6 (13%)            | 9 (12%)      | P=0.845 (pearson chi-square) |

\*N=13 or 11% unknown BRAF status / \*\*N=8 or 17% unknown BRAF status / \*\*\*N=5 or 7% unknown BRAF status

Supplemental Figure 1. Overall survival. Panel A, all patients with advanced melanoma treated with anti-PD-1 therapy. The anti-PD-1 monotherapy cohort had 20/46 events and median OS was not reached. The anti-PD-1 combination therapy cohort had 23/76 events and median OS was 83.3 mos. Log-rank  $P=0.052$ . Panel B, all treatment naive patients with advanced melanoma treated with anti-PD-1 therapy. The anti-PD-1 monotherapy cohort had 10/24 events and median OS not reached. The anti-PD-1 combination therapy cohort had 14/54 events and median OS was not reached. Log-rank  $P=0.053$ .

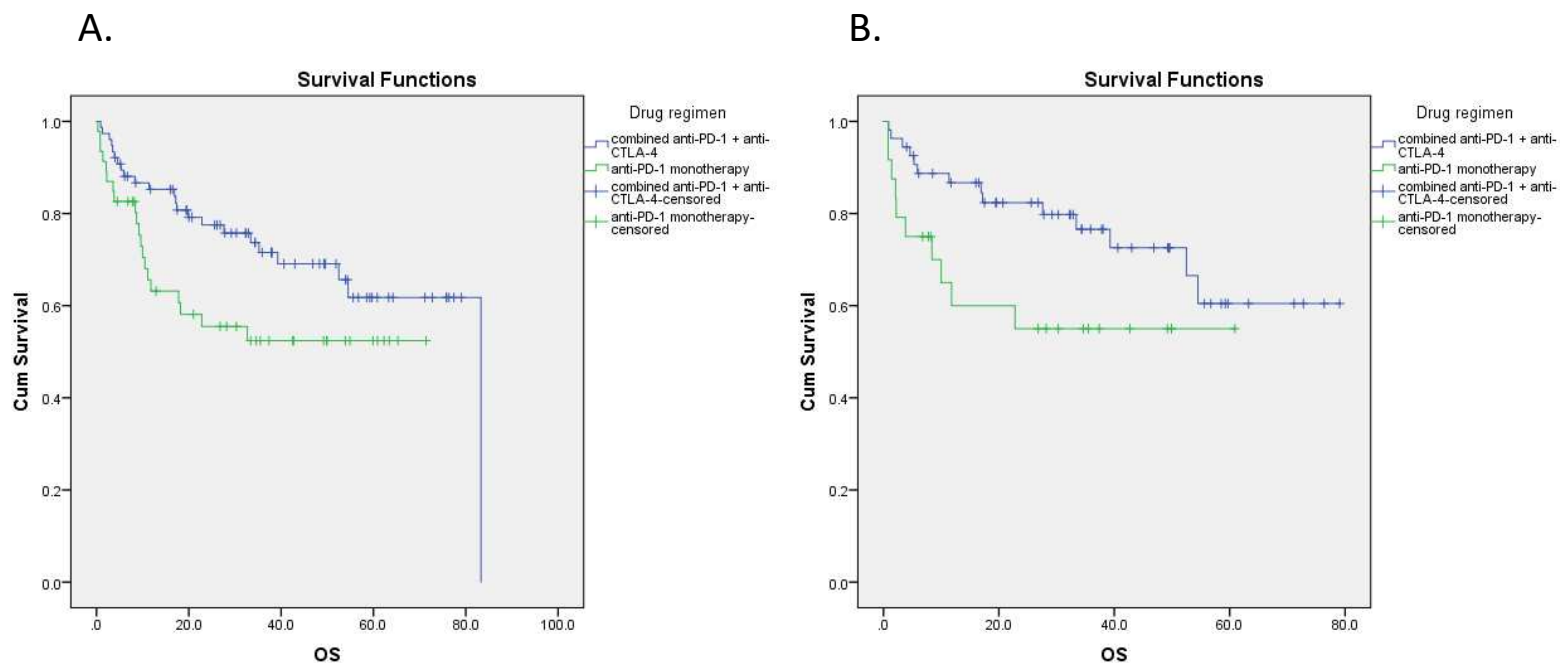

## Supplemental Table 2. EFS outcomes and estimated survival.

|                             | Choice (N=24) | Toxicity (N=28) |
|-----------------------------|---------------|-----------------|
| 1yr EFS                     | 100%          | 87%             |
| 2yr EFS                     | 95%           | 83%             |
| 3yr EFS                     | 95%           | 71%             |
| 4yr EFS                     | 81%           | 71%             |
| EFS Events                  | 2 (8%)        | 6 (21%)         |
| Subsequent systemic therapy | 1 (7%)        | 4 (14%)         |
| Deceased                    | 1 (7%)        | 2 (7%)          |
| Median follow up            | 30.9 months   | 39.3 months     |

Supplemental Table 3. Baseline characteristics and treatment outcomes for patients with an event. BOR, best overall response. M, male; F, female. Nivo/Ipi, nivolumab plus ipilimumab. mos, months. Vem/cobi, vemurafenib plus cobimetinib. Bev, bevacizumab; given for radiation necrosis. Dab/Tram, dabrafenib plus trametinib. Pembro, pembrolizumab. NED, no evidence of active disease.

| Patient | Age   | Gender | BRAF V600 Mutant | Treatment Received | BOR | Reason off treatment | Treatment Duration | EFS    | Subsequent management      | Outcome                                        |
|---------|-------|--------|------------------|--------------------|-----|----------------------|--------------------|--------|----------------------------|------------------------------------------------|
| 1       | 61 yr | M      | No               | Nivo/Ipi           | CR  | CR on CT             | 16 mos             | 20 mos | Surgery (LN metastasis)    | Alive                                          |
| 2       | 70 yr | M      | No               | Nivo/Ipi           | PR  | PET/CT neg           | 12 mos             | 38 mos | Nivo/Ipi                   | Deceased                                       |
| 3       | 54 yr | F      | Yes              | Nivo/Ipi           | SD  | Immune colitis       | 8 mos              | 1 mos  | Ipi<br>Dab/Tram            | Alive                                          |
| 4       | 53 yr | M      | No               | Nivo/Ipi           | PR  | Immune colitis       | 2 mos              | 30 mos | Surgery<br>Bev             | Lost to follow up with progressive CNS disease |
| 5       | 36 yr | F      | Yes              | Nivo/Ipi           | PR  | Immune colitis       | 1 mos              | 17 mos | Pembro<br>Dab/Tram         | Alive                                          |
| 6       | 64 yr | F      | Yes              | Nivo/Ipi           | PR  | Immune myositis      | 4 mos              | 7 mos  | Dab/Tram<br>Pembro         | Deceased                                       |
| 7       | 48 yr | F      | No               | Nivo/Ipi           | PR  | Immune colitis       | 2 mos              | 10 mos | Pembro<br>Surgery          | Deceased                                       |
| 8       | 66 yr | M      | No               | Pembro             | PR  | Immune hepatitis     | 12 mos             | 25 mos | Surgery (brain metastasis) | Alive                                          |

## Supplemental Table 4. EFS Associations with Baseline Variables by Cox Regression (Univariate).

|                                                                        | Events                                  | HR     | 95% CI        | P value |
|------------------------------------------------------------------------|-----------------------------------------|--------|---------------|---------|
| Primary type                                                           |                                         |        |               |         |
| Mucosal vs Cutaneous                                                   | 2/4 mucosal<br>5/31 cutaneous           | 1.964  | 0.863-4.473   | 0.108   |
| Mucosal vs Unknown Primary                                             | 2/4 mucosal<br>1/16 unknown primary     | 15.625 | 1.391-175.502 | 0.026   |
| LDH level (elevated vs normal)                                         | 3/15 elevated<br>4/36 normal            | 2.385  | 0.530-10.744  | 0.258   |
| Brain metastasis (present vs absent)                                   | 1/17 present<br>7/35 absent             | 0.309  | 0.038-2.521   | 0.273   |
| Stage M1c-M1d vs IIIb-M1b                                              | 6/34 M1c-M1d<br>2/18 IIIb-M1b           | 1.896  | 0.381-9.423   | 0.434   |
| Prior systemic tx (yes vs no)                                          | 3/15 yes<br>5/37 no                     | 1.394  | 0.331-5.864   | 0.651   |
| Prior Ipilimumab (yes vs no)                                           | 1/9 yes<br>7/43 no                      | 0.647  | 0.079-5.285   | 0.685   |
| Prior BRAF targeted treatment (yes vs no)<br><i>only BRAF V600 mut</i> | 1/5 yes<br>3/11 no                      | 0.938  | 0.097-9.110   | 0.956   |
| Drug regimen (mono vs combo)                                           | 1/17 mono<br>7/35 combo                 | 0.274  | 0.034-2.229   | 0.226   |
| Gender (female vs male)                                                | 4/18 female<br>4/34 male                | 2.126  | 0.531-8.506   | 0.287   |
| Reason for DC (toxicity vs choice)                                     | 6/28 toxicity<br>2/24 choice            | 2.991  | 0.601-14.885  | 0.181   |
| ECOG PS (1 vs 0)                                                       | 3/19 ECOG PS 1<br>4/32 ECOG PS 0        | 1.317  | 0.292-5.941   | 0.720   |
| BRAF mutation (mutant vs wild-type)                                    | 4/16 BRAF mutant<br>4/28 BRAF wild-type | 2.226  | 0.553-8.956   | 0.260   |
